# Supplementary material
Source: PubMed Central journal article supplement (PMC7646206)
Supplement: DC192202SupplementaryData.pdf [file DC192202SupplementaryData.pdf]

SUPPLEMENTARY DATA

Supplementary Figure 1. Participants' flow chart

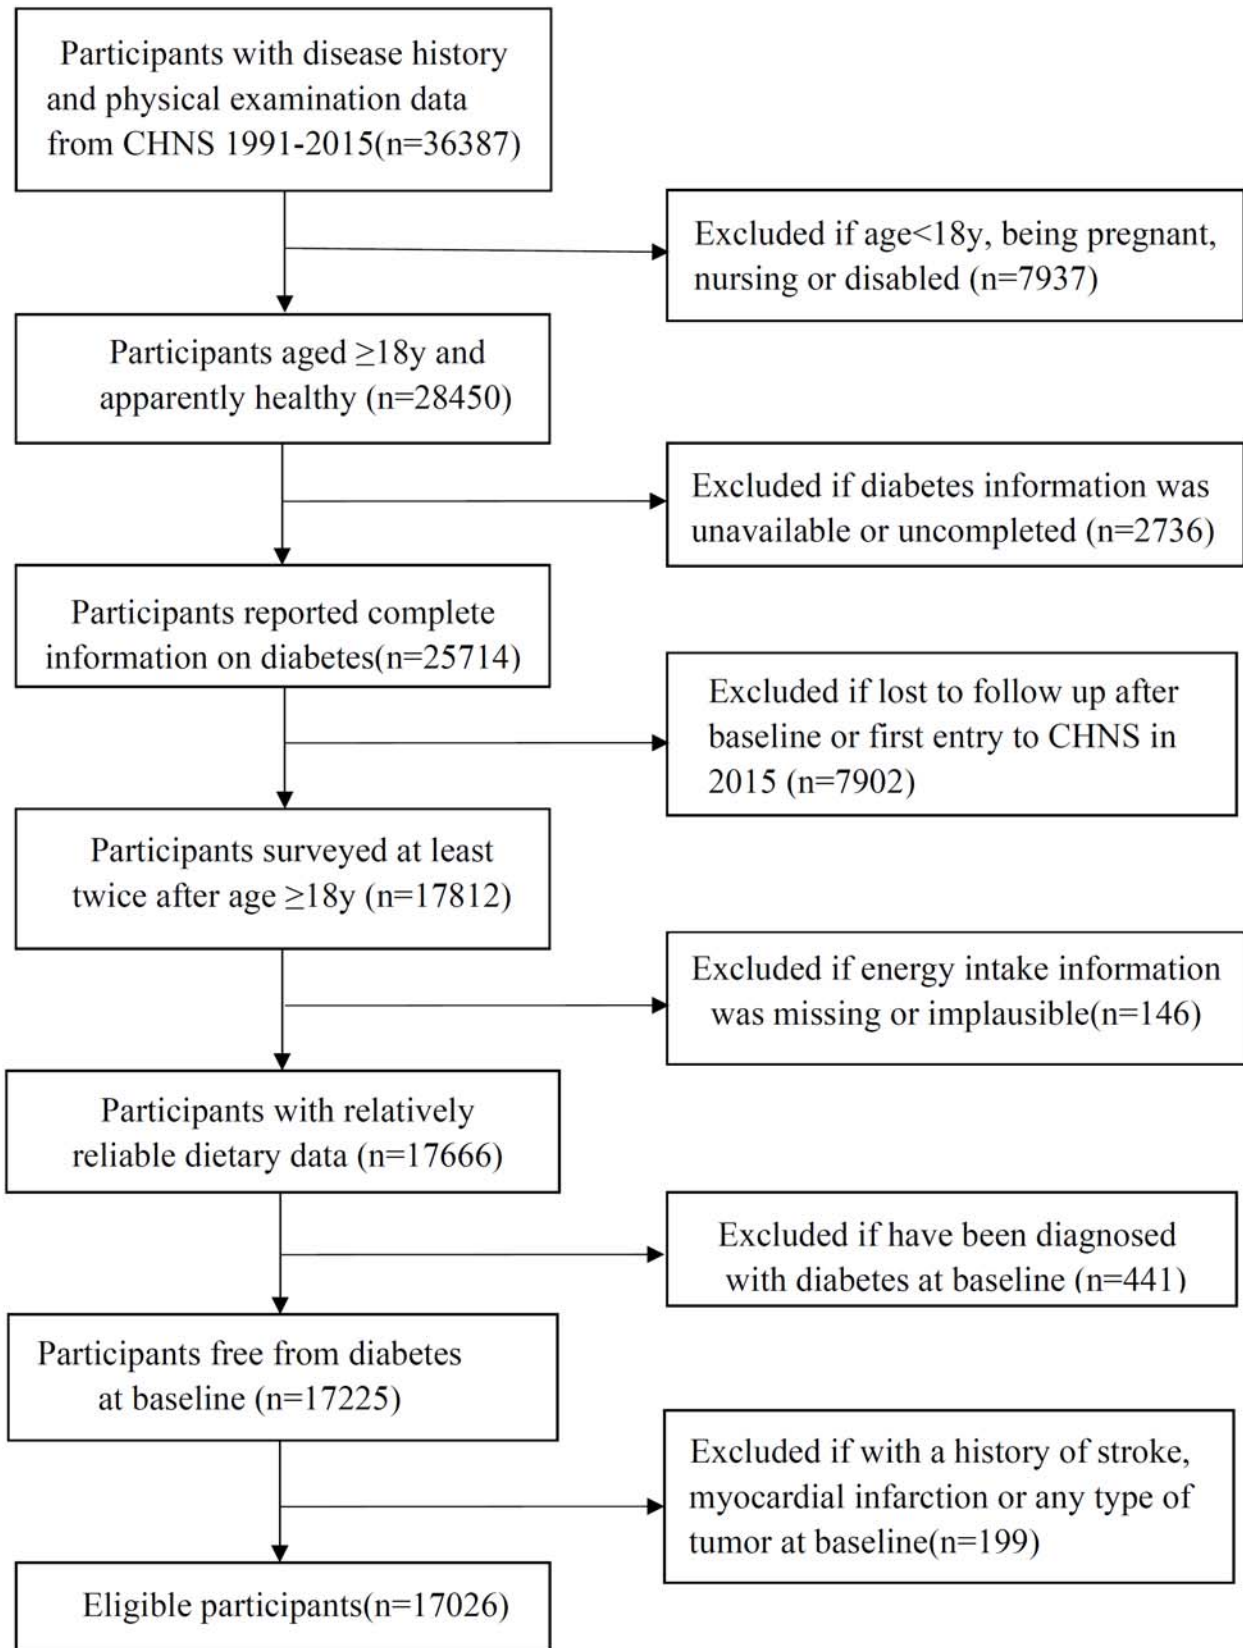

SUPPLEMENTARY DATA

**Supplementary Table 1. HRs (95% CIs) of diabetes risk according to quintiles of dietary heme, non-heme and total iron intake stratified by BMI, age, smoking and alcohol drinking status in Chinese men and women**

|                                   | Quintiles of intake in men |                 |                 |                 |       | P for trend       | Quintiles of intake in women     |                 |                 |                 |       | P for trend |       |
|-----------------------------------|----------------------------|-----------------|-----------------|-----------------|-------|-------------------|----------------------------------|-----------------|-----------------|-----------------|-------|-------------|-------|
|                                   | Q1                         | Q2              | Q3              | Q4              | Q5    |                   | Q1                               | Q2              | Q3              | Q4              | Q5    |             |       |
| <b>Heme iron</b>                  |                            |                 |                 |                 |       |                   |                                  |                 |                 |                 |       |             |       |
| BMI<24kg/m <sup>2</sup> (n=6145)  |                            |                 |                 |                 |       |                   | BMI<24kg/m <sup>2</sup> (n=6144) |                 |                 |                 |       |             |       |
| HR (95%CI) 1(ref)                 | 0.69(0.47-1.00) *          | 0.76(0.49-1.17) | 0.70(0.43-1.15) | 0.63(0.36-1.12) | 0.331 | HR (95%CI) 1(ref) | 0.65(0.44-0.96)                  | 0.85(0.54-1.32) | 0.71(0.42-1.19) | 0.95(0.55-1.65) | 0.515 |             |       |
| BMI≥24kg/m <sup>2</sup> (n=2201)  |                            |                 |                 |                 |       |                   | BMI≥24kg/m <sup>2</sup> (n=2536) |                 |                 |                 |       |             |       |
| HR (95%CI) 1(ref)                 | 1.30(0.79-2.12)            | 0.84(0.47-1.51) | 0.99(0.53-1.87) | 0.83(0.41-1.69) | 0.287 | HR (95%CI) 1(ref) | 0.93(0.63-1.38)                  | 0.79(0.49-1.26) | 0.71(0.42-1.20) | 0.77(0.42-1.41) | 0.442 |             |       |
| P-interaction                     |                            |                 |                 |                 |       | 0.106             | P-interaction                    |                 |                 |                 |       |             | 0.565 |
| Age<50y (n=6126)                  |                            |                 |                 |                 |       |                   | Age<50y (n=6249)                 |                 |                 |                 |       |             |       |
| HR (95%CI) 1(ref)                 | 1.00(0.70-1.43)            | 0.73(0.47-1.13) | 0.69(0.43-1.13) | 0.77(0.44-1.34) | 0.431 | HR (95%CI) 1(ref) | 0.69(0.48-1.00)                  | 0.77(0.49-1.21) | 0.67(0.40-1.12) | 0.73(0.40-1.33) | 0.719 |             |       |
| Age≥50y (n=2220)                  |                            |                 |                 |                 |       |                   | Age≥50y (n=2431)                 |                 |                 |                 |       |             |       |
| HR (95%CI) 1(ref)                 | 0.64(0.37-1.09)            | 0.75(0.41-1.36) | 0.86(0.45-1.64) | 0.56(0.27-1.19) | 0.348 | HR (95%CI) 1(ref) | 0.69(0.45-1.05)                  | 0.70(0.43-1.12) | 0.55(0.32-0.95) | 0.83(0.47-1.49) | 0.924 |             |       |
| P-interaction                     |                            |                 |                 |                 |       | 0.638             | P-interaction                    |                 |                 |                 |       |             | 0.501 |
| Non-smoker (n=3143)               |                            |                 |                 |                 |       |                   | Non-smoker (n=8318)              |                 |                 |                 |       |             |       |
| HR(95%CI) 1(ref)                  | 0.68(0.41-1.13)            | 0.53(0.30-0.95) | 0.46(0.24-0.89) | 0.33(0.15-0.70) | 0.009 | HR(95%CI) 1(ref)  | 0.75(0.56-1.00)                  | 0.76(0.54-1.07) | 0.63(0.43-0.93) | 0.82(0.53-1.26) | 0.919 |             |       |
| Former or current smoker (n=5203) |                            |                 |                 |                 |       |                   | Ever or current smoke (n=362)    |                 |                 |                 |       |             |       |
| HR(95%CI) 1(ref)                  | 0.94(0.65-1.35)            | 0.89(0.57-1.37) | 1.00(0.62-1.61) | 0.99(0.58-1.69) | 0.780 | HR(95%CI) 1(ref)  | 0.67(0.22-2.01)                  | 0.80(0.24-2.71) | 1.08(0.31-3.73) | 0.11(0.01-1.41) | 0.279 |             |       |
| P-interaction                     |                            |                 |                 |                 |       | 0.309             | P-interaction                    |                 |                 |                 |       |             | 0.130 |
| Non-drinker (n=3141)              |                            |                 |                 |                 |       |                   | Non-drinker (n=7655)             |                 |                 |                 |       |             |       |
| HR(95%CI) 1(ref)                  | 0.78(0.46-1.32)            | 0.95(0.52-1.74) | 0.71(0.36-1.43) | 0.58(0.26-1.28) | 0.141 | HR(95%CI) 1(ref)  | 0.74(0.55-0.99)                  | 0.76(0.54-1.08) | 0.65(0.44-0.96) | 0.80(0.52-1.24) | 0.793 |             |       |
| Drinker (n=5205)                  |                            |                 |                 |                 |       |                   | Drinker (n=1025)                 |                 |                 |                 |       |             |       |
| HR(95%CI) 1(ref)                  | 0.90(0.63-1.28)            | 0.68(0.44-1.04) | 0.80(0.50-1.28) | 0.73(0.43-1.24) | 0.435 | HR(95%CI) 1(ref)  | 0.73(0.32-1.65)                  | 0.71(0.28-1.77) | 0.63(0.22-1.81) | 0.67(0.21-2.14) | 0.677 |             |       |
| P-interaction                     |                            |                 |                 |                 |       | 0.733             | P-interaction                    |                 |                 |                 |       |             | 0.541 |
| <b>Non-heme iron</b>              |                            |                 |                 |                 |       |                   |                                  |                 |                 |                 |       |             |       |
| BMI<24kg/m <sup>2</sup> (n=6145)  |                            |                 |                 |                 |       |                   | BMI<24kg/m <sup>2</sup> (n=6144) |                 |                 |                 |       |             |       |
| HR (95%CI) 1(ref)                 | 0.94(0.65-1.35)            | 0.91(0.63-1.32) | 0.72(0.48-1.08) | 1.07(0.71-1.61) | 0.805 | HR (95%CI) 1(ref) | 0.53(0.36-0.77)                  | 0.48(0.32-0.70) | 0.47(0.31-0.69) | 0.58(0.38-0.86) | 0.034 |             |       |

## SUPPLEMENTARY DATA

|                                         |        |                 |                 |                 |                                         |       |            |        |                 |                 |                 |                 |       |
|-----------------------------------------|--------|-----------------|-----------------|-----------------|-----------------------------------------|-------|------------|--------|-----------------|-----------------|-----------------|-----------------|-------|
| BMI $\geq$ 24kg/m <sup>2</sup> (n=2201) |        |                 |                 |                 | BMI $\geq$ 24kg/m <sup>2</sup> (n=2536) |       |            |        |                 |                 |                 |                 |       |
| HR (95%CI)                              | 1(ref) | 0.55(0.35-0.87) | 0.48(0.30-0.77) | 0.50(0.31-0.81) | 0.63(0.38-1.04)                         | 0.497 | HR (95%CI) | 1(ref) | 0.86(0.56-1.33) | 0.81(0.52-1.26) | 0.93(0.59-1.46) | 1.01(0.61-1.66) | 0.644 |
| P-interaction                           |        |                 |                 |                 | 0.073 P-interaction                     |       |            |        |                 | 0.138           |                 |                 |       |
| Age<50y (n=6126)                        |        |                 |                 |                 | Age<50y (n=6249)                        |       |            |        |                 |                 |                 |                 |       |
| HR (95%CI)                              | 1(ref) | 0.84(0.59-1.19) | 0.73(0.51-1.06) | 0.63(0.43-0.92) | 0.92(0.63-1.36)                         | 0.818 | HR (95%CI) | 1(ref) | 0.51(0.35-0.74) | 0.52(0.36-0.75) | 0.47(0.32-0.69) | 0.52(0.34-0.78) | 0.017 |
| Age $\geq$ 50y (n=2220)                 |        |                 |                 |                 | Age $\geq$ 50y (n=2431)                 |       |            |        |                 |                 |                 |                 |       |
| HR (95%CI)                              | 1(ref) | 0.58(0.35-0.98) | 0.71(0.43-1.15) | 0.61(0.36-1.03) | 0.74(0.43-1.26)                         | 0.292 | HR (95%CI) | 1(ref) | 0.81(0.52-1.25) | 0.69(0.44-1.08) | 0.79(0.51-1.23) | 0.97(0.60-1.56) | 0.800 |
| P-interaction                           |        |                 |                 |                 | 0.190 P-interaction                     |       |            |        |                 | 0.559           |                 |                 |       |
| Non-smoker (n=3143)                     |        |                 |                 |                 | Non-smoker (n=8318)                     |       |            |        |                 |                 |                 |                 |       |
| HR(95%CI)                               | 1(ref) | 0.66(0.38-1.13) | 0.91(0.54-1.54) | 0.88(0.51-1.52) | 1.37(0.79-2.38)                         | 0.044 | HR(95%CI)  | 1(ref) | 0.63(0.48-0.84) | 0.55(0.41-0.73) | 0.57(0.43-0.77) | 0.63(0.46-0.88) | 0.044 |
| Former or current smoker (n=5203)       |        |                 |                 |                 | Ever or current smoke (n=362)           |       |            |        |                 |                 |                 |                 |       |
| HR(95%CI)                               | 1(ref) | 0.83(0.59-1.17) | 0.68(0.48-0.97) | 0.55(0.37-0.79) | 0.70(0.48-1.03)                         | 0.057 | HR(95%CI)  | 1(ref) | 0.49(0.11-2.13) | 0.92(0.26-3.25) | 0.84(0.24-2.97) | 1.44(0.40-5.22) | 0.268 |
| P-interaction                           |        |                 |                 |                 | <b>0.030</b> P-interaction              |       |            |        |                 | 0.110           |                 |                 |       |
| Non-drinker (n=3141)                    |        |                 |                 |                 | Non-drinker (n=7655)                    |       |            |        |                 |                 |                 |                 |       |
| HR(95%CI)                               | 1(ref) | 0.88(0.54-1.46) | 0.89(0.53-1.49) | 0.59(0.33-1.06) | 0.98(0.57-1.69)                         | 0.980 | HR(95%CI)  | 1(ref) | 0.66(0.49-0.89) | 0.62(0.46-0.84) | 0.60(0.44-0.82) | 0.68(0.49-0.95) | 0.101 |
| Drinker (n=5205)                        |        |                 |                 |                 | Drinker (n=1025)                        |       |            |        |                 |                 |                 |                 |       |
| HR(95%CI)                               | 1(ref) | 0.71(0.50-1.01) | 0.66(0.47-0.94) | 0.65(0.45-0.94) | 0.85(0.58-1.25)                         | 0.806 | HR(95%CI)  | 1(ref) | 0.42(0.19-0.95) | 0.33(0.14-0.77) | 0.45(0.20-1.02) | 0.52(0.22-1.24) | 0.538 |
| P-interaction                           |        |                 |                 |                 | 0.837 P-interaction                     |       |            |        |                 | 0.727           |                 |                 |       |
| <b>Total iron</b>                       |        |                 |                 |                 |                                         |       |            |        |                 |                 |                 |                 |       |
| BMI<24kg/m <sup>2</sup> (n=6145)        |        |                 |                 |                 | BMI<24kg/m <sup>2</sup> (n=6144)        |       |            |        |                 |                 |                 |                 |       |
| HR (95%CI)                              | 1(ref) | 0.83(0.58-1.19) | 0.7(0.48-1.02)  | 0.72(0.49-1.06) | 0.98(0.65-1.46)                         | 0.913 | HR (95%CI) | 1(ref) | 0.46(0.31-0.68) | 0.6(0.41-0.87)  | 0.48(0.32-0.71) | 0.62(0.41-0.94) | 0.102 |
| BMI $\geq$ 24kg/m <sup>2</sup> (n=2201) |        |                 |                 |                 | BMI $\geq$ 24kg/m <sup>2</sup> (n=2536) |       |            |        |                 |                 |                 |                 |       |
| HR (95%CI)                              | 1(ref) | 0.59(0.38-0.94) | 0.49(0.31-0.78) | 0.46(0.28-0.74) | 0.63(0.38-1.04)                         | 0.332 | HR (95%CI) | 1(ref) | 0.72(0.47-1.11) | 0.89(0.59-1.33) | 0.8(0.52-1.24)  | 0.98(0.61-1.57) | 0.671 |
| P-interaction                           |        |                 |                 |                 | 0.068 P-interaction                     |       |            |        |                 | 0.153           |                 |                 |       |
| Age<50y (n=6126)                        |        |                 |                 |                 | Age<50y (n=6249)                        |       |            |        |                 |                 |                 |                 |       |
| HR (95%CI)                              | 1(ref) | 0.81(0.57-1.14) | 0.67(0.47-0.96) | 0.63(0.43-0.91) | 0.91(0.62-1.34)                         | 0.891 | HR (95%CI) | 1(ref) | 0.45(0.3-0.65)  | 0.56(0.39-0.8)  | 0.47(0.32-0.69) | 0.57(0.38-0.86) | 0.080 |
| Age $\geq$ 50y (n=2220)                 |        |                 |                 |                 | Age $\geq$ 50y (n=2431)                 |       |            |        |                 |                 |                 |                 |       |

## SUPPLEMENTARY DATA

|                                   |                 |                 |                 |                 |       |                               |                 |                 |                 |                 |       |
|-----------------------------------|-----------------|-----------------|-----------------|-----------------|-------|-------------------------------|-----------------|-----------------|-----------------|-----------------|-------|
| HR (95%CI) 1(ref)                 | 0.51(0.31-0.83) | 0.51(0.31-0.83) | 0.53(0.32-0.88) | 0.62(0.36-1.05) | 0.325 | HR (95%CI) 1(ref)             | 0.68(0.43-1.07) | 0.93(0.62-1.41) | 0.77(0.5-1.2)   | 0.98(0.62-1.58) | 0.719 |
| P-interaction                     |                 |                 |                 |                 | 0.184 | P-interaction                 |                 |                 |                 |                 | 0.637 |
| Non-smoker (n=3143)               |                 |                 |                 |                 |       | Non-smoker (n=8318)           |                 |                 |                 |                 |       |
| HR(95%CI) 1(ref)                  | 0.65(0.39-1.08) | 0.79(0.47-1.33) | 0.76(0.44-1.3)  | 1.13(0.65-1.96) | 0.212 | HR(95%CI) 1(ref)              | 0.55(0.41-0.74) | 0.67(0.5-0.88)  | 0.56(0.42-0.76) | 0.69(0.5-0.95)  | 0.157 |
| Former or current smoker (n=5203) |                 |                 |                 |                 |       | Ever or current smoke (n=362) |                 |                 |                 |                 |       |
| HR(95%CI) 1(ref)                  | 0.78(0.56-1.09) | 0.56(0.4-0.8)   | 0.55(0.38-0.79) | 0.7(0.48-1.01)  | 0.088 | HR(95%CI) 1(ref)              | 0.43(0.12-1.55) | 0.97(0.3-3.14)  | 0.75(0.22-2.55) | 1.24(0.35-4.41) | 0.397 |
| P-interaction                     |                 |                 |                 |                 | 0.082 | P-interaction                 |                 |                 |                 |                 | 0.355 |
| Non-drinker (n=3141)              |                 |                 |                 |                 |       | Non-drinker (n=7655)          |                 |                 |                 |                 |       |
| HR(95%CI) 1(ref)                  | 0.78(0.47-1.27) | 0.79(0.47-1.31) | 0.49(0.28-0.86) | 0.85(0.5-1.47)  | 0.657 | HR(95%CI) 1(ref)              | 0.6(0.44-0.82)  | 0.75(0.56-1)    | 0.63(0.47-0.86) | 0.72(0.52-1.01) | 0.234 |
| Drinker (n=5205)                  |                 |                 |                 |                 |       | Drinker (n=1025)              |                 |                 |                 |                 |       |
| HR(95%CI) 1(ref)                  | 0.72(0.51-1.01) | 0.56(0.4-0.8)   | 0.66(0.46-0.95) | 0.84(0.58-1.22) | 0.815 | HR(95%CI) 1(ref)              | 0.26(0.11-0.64) | 0.39(0.18-0.85) | 0.24(0.1-0.59)  | 0.54(0.24-1.22) | 0.538 |
| P-interaction                     |                 |                 |                 |                 | 0.869 | P-interaction                 |                 |                 |                 |                 | 0.737 |

\*Values are multivariable-adjusted HRs (95% CIs) for risk of diabetes according to quintiles of dietary heme, non-heme and total iron intake stratified by BMI, age, smoking and alcohol drinking status in model 3s.
